# Supplementary material for: MIF -173 G > C (rs755622) Gene Polymorphism Modulates Tuberculosis Risk: Evidence from a Meta-analysis and Trial Sequential Analysis
Source: PubMed Central journal article supplement (PMC5717251; doi:10.1038/s41598-017-17308-y), 2017-12-05
Supplement: 41598_2017_17308_MOESM1_ESM.pdf [file 41598_2017_17308_MOESM1_ESM.pdf]

## Supplementary Information

### ***MIF* -173 G>C (rs755622) Gene Polymorphism Modulates Tuberculosis Risk: Evidence from a Meta-analysis and Trial Sequential Analysis**

*Authors' names in order of their authorship*

Mohammed Y. Areeshi<sup>1</sup>, Raju K. Mandal<sup>1</sup>, Sajad A. Dar<sup>1,2</sup>, Arshad Jawed<sup>1</sup>, Mohd Wahid<sup>1</sup>, Mohtashim Lohani<sup>1</sup>, Aditya K Panda<sup>3</sup>, B.N. Mishra<sup>4</sup>, Naseem Akhter<sup>5</sup>, Shafiul Haque<sup>1</sup>✉

Funnel Plot of Standard Error by Log odds ratio

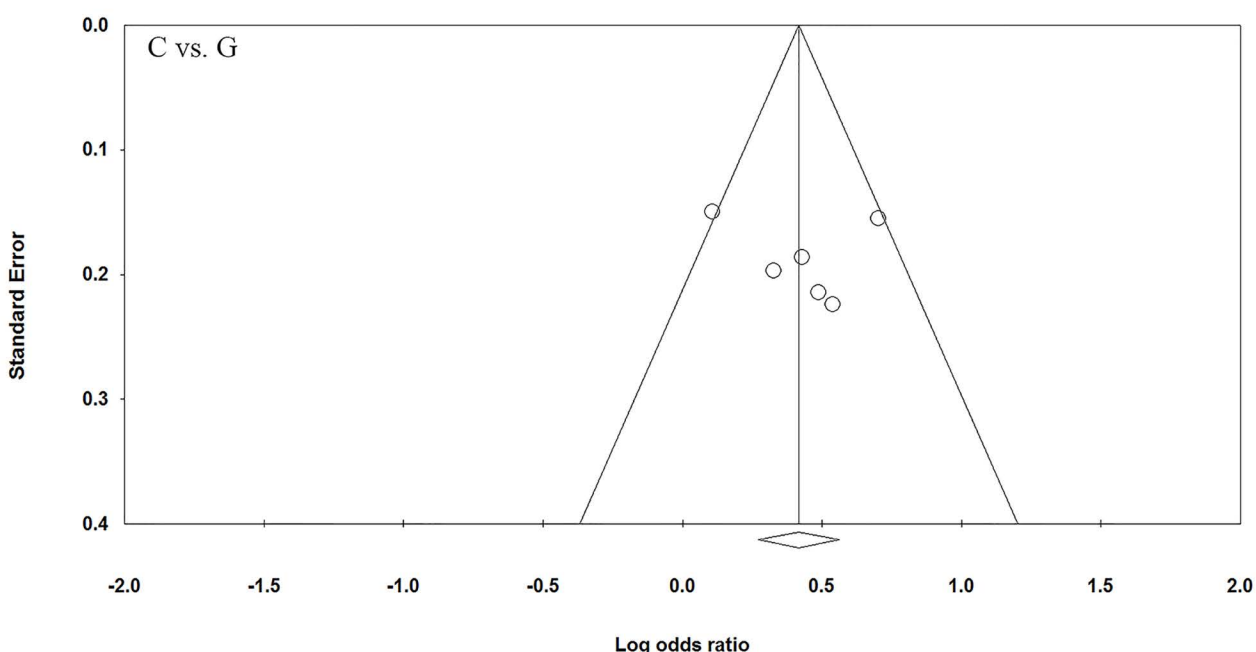

Funnel Plot of Standard Error by Log odds ratio

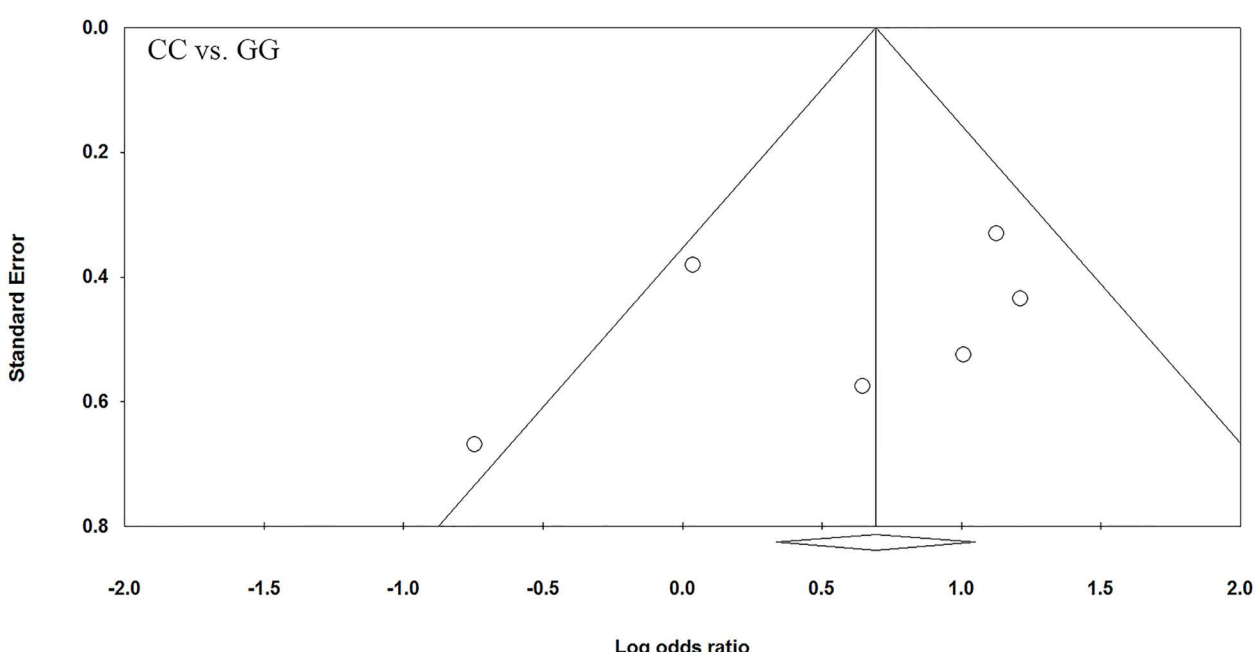

Funnel Plot of Standard Error by Log odds ratio

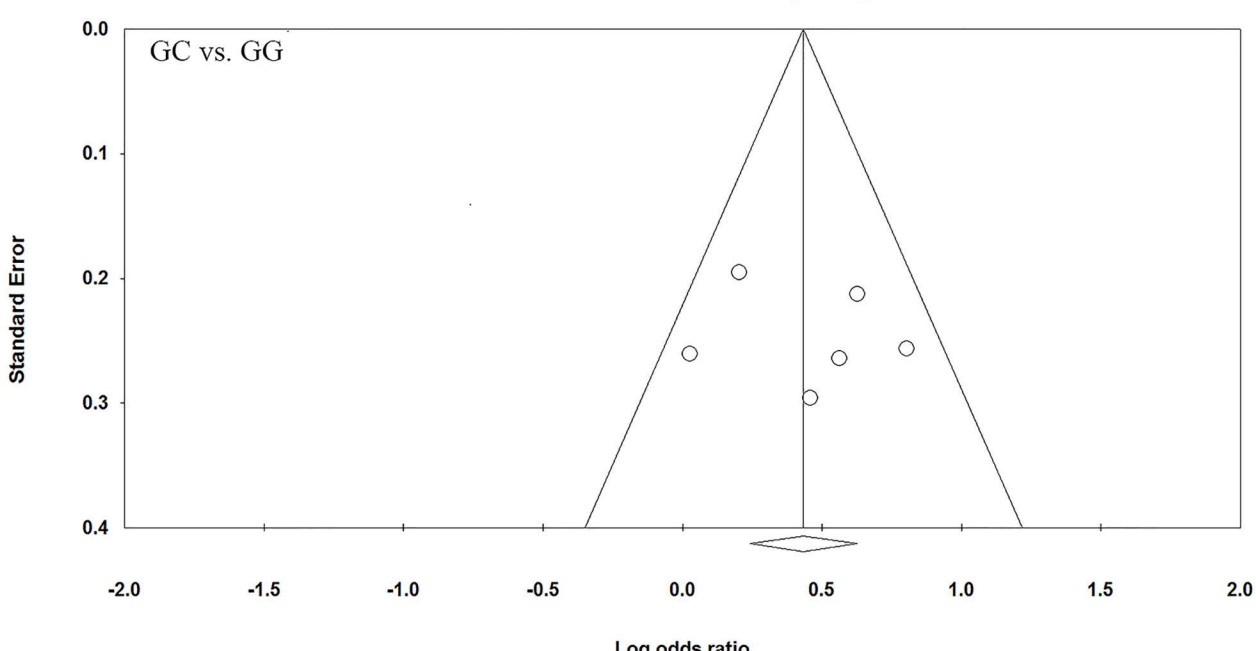

Funnel Plot of Standard Error by Log odds ratio

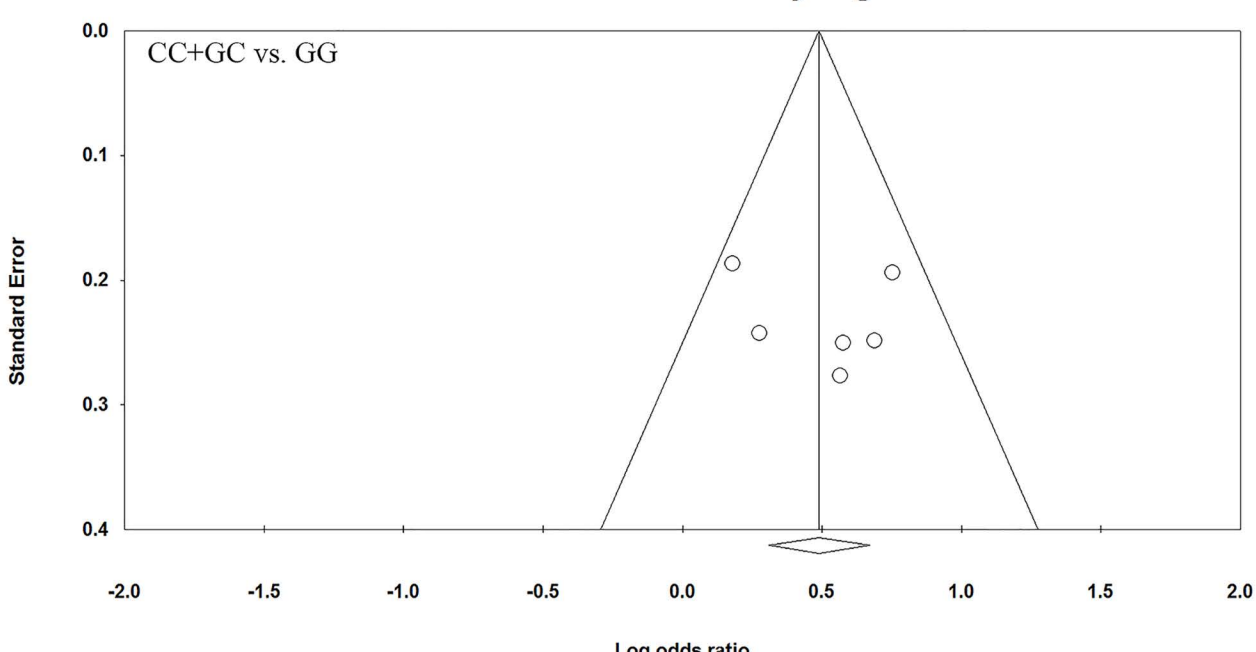

Funnel Plot of Standard Error by Log odds ratio

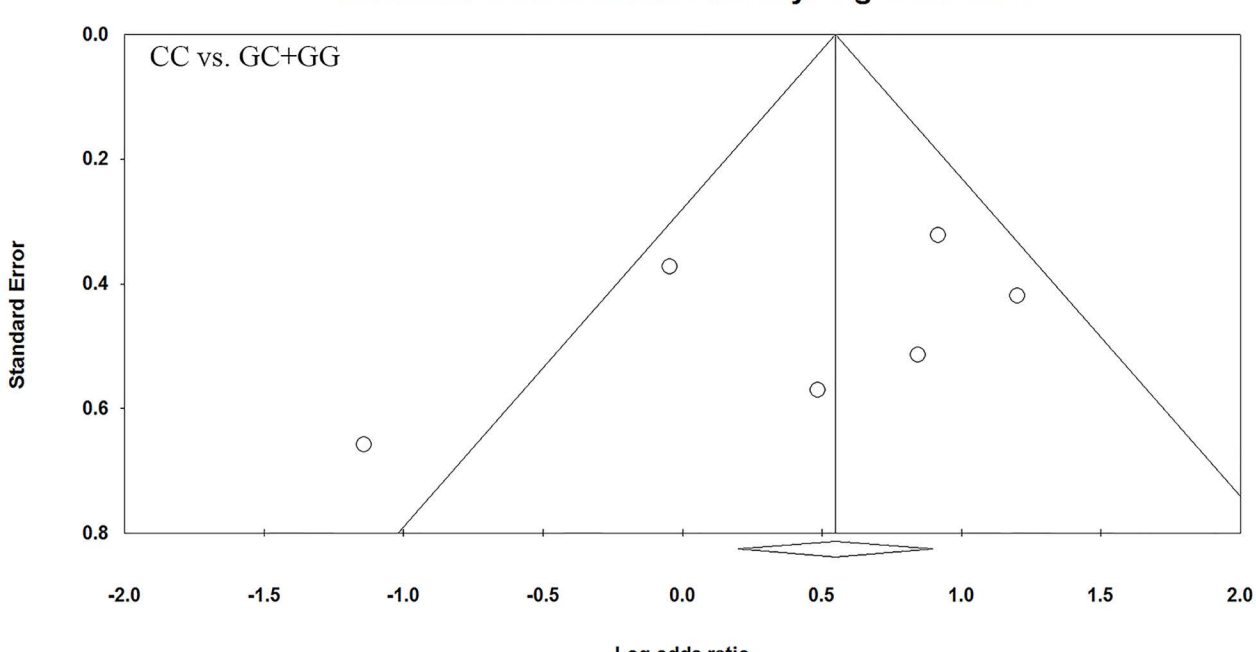

Figure SI1: Assessment of publication bias shown with Funnel plots in studies assaying odds of TB associated with the MIF -173 G>C gene polymorphism for overall analysis (Odds ratio against standard error in different genetic models).

**Funnel Plot of Standard Error by Log odds ratio**

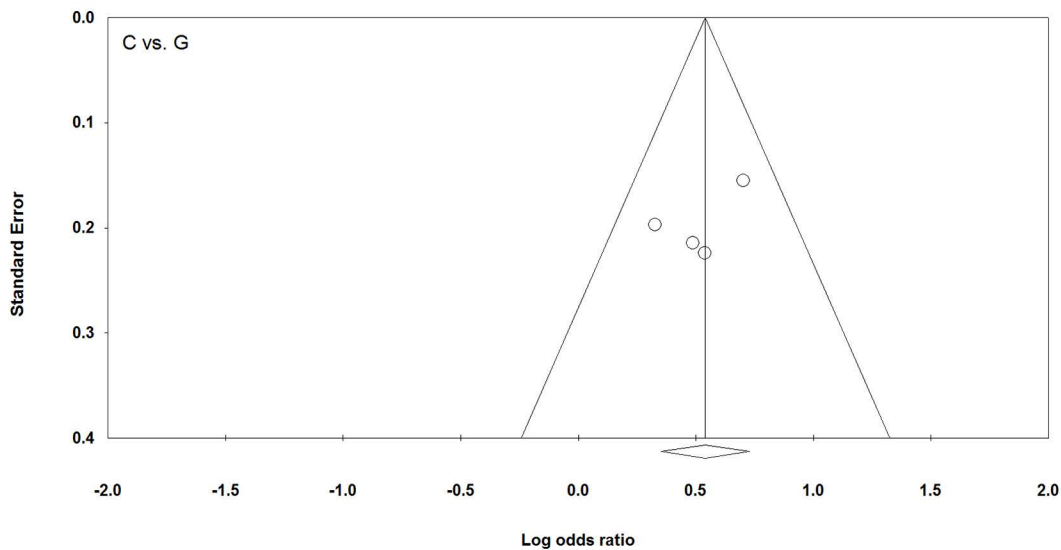

**Funnel Plot of Standard Error by Log odds ratio**

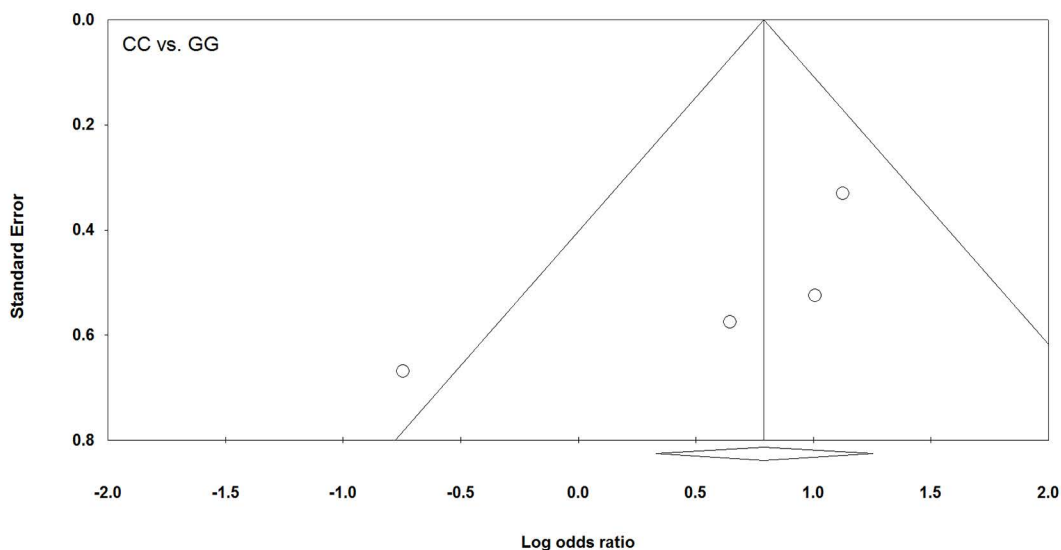

**Funnel Plot of Standard Error by Log odds ratio**

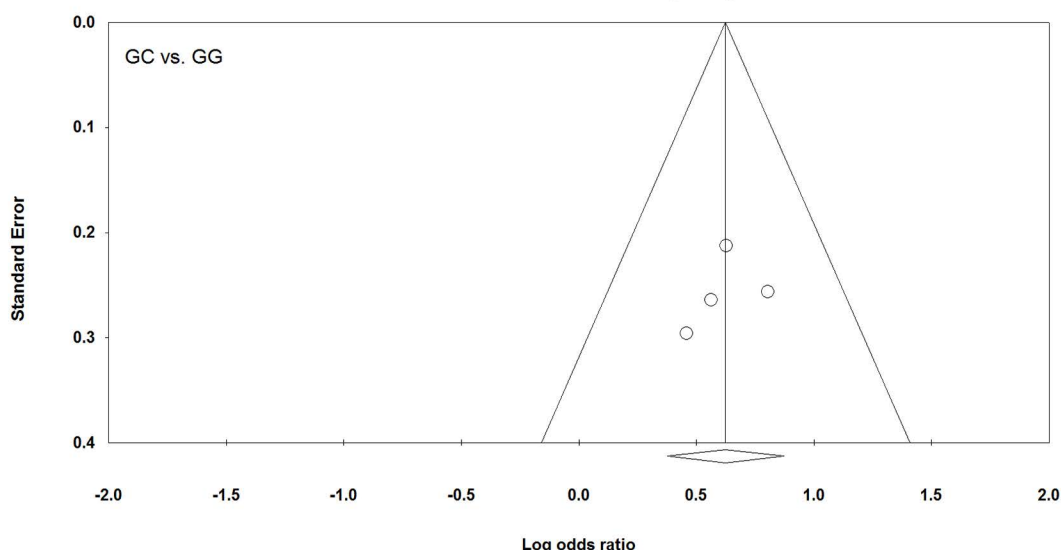

**Funnel Plot of Standard Error by Log odds ratio**

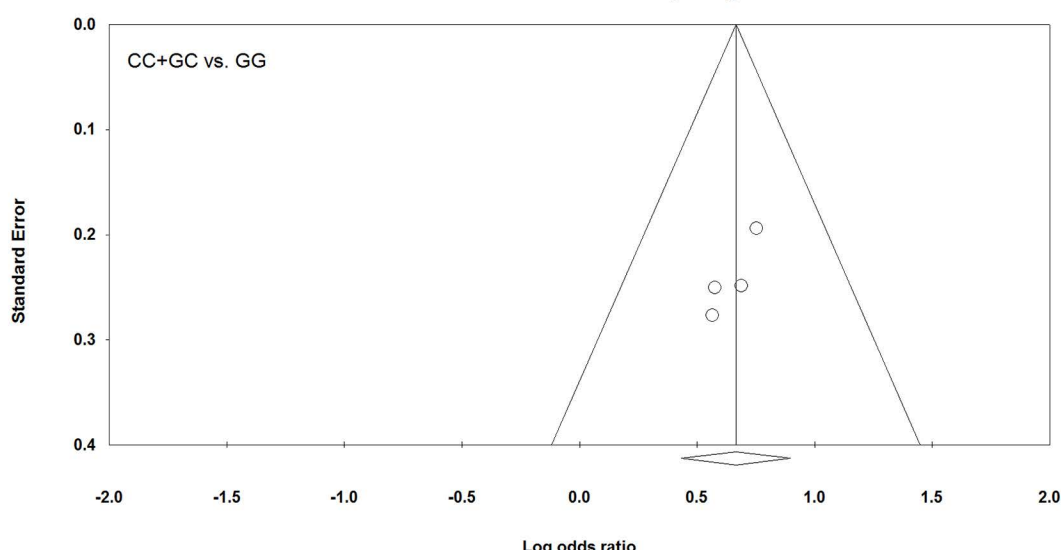

**Funnel Plot of Standard Error by Log odds ratio**

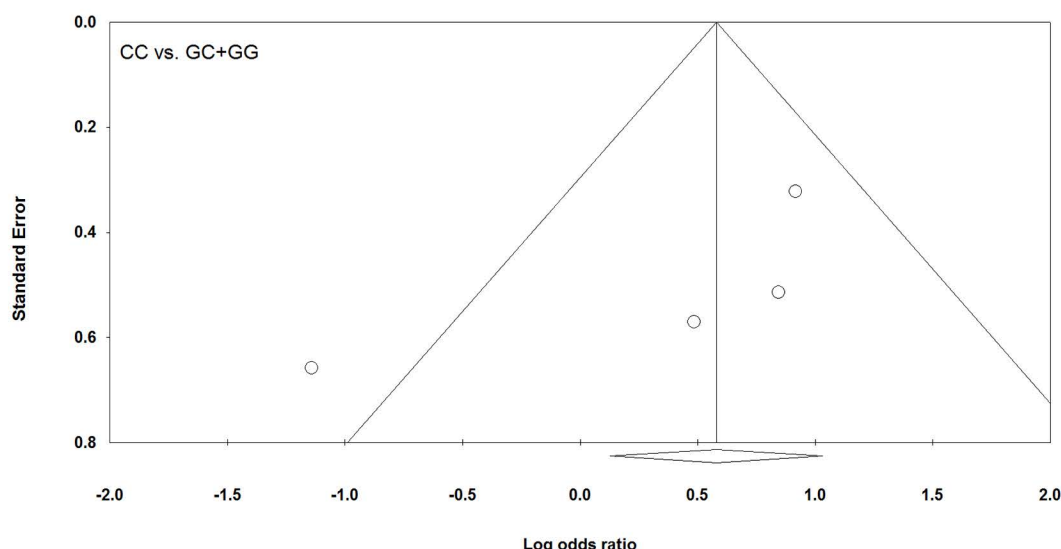

Figure SI2: Assessment of publication bias shown with Funnel plots in studies assaying odds of TB associated with the MIF -173 G>C gene polymorphism for sub-group (Asian ethnicity population) analysis (Odds ratio against standard error in different genetic models).

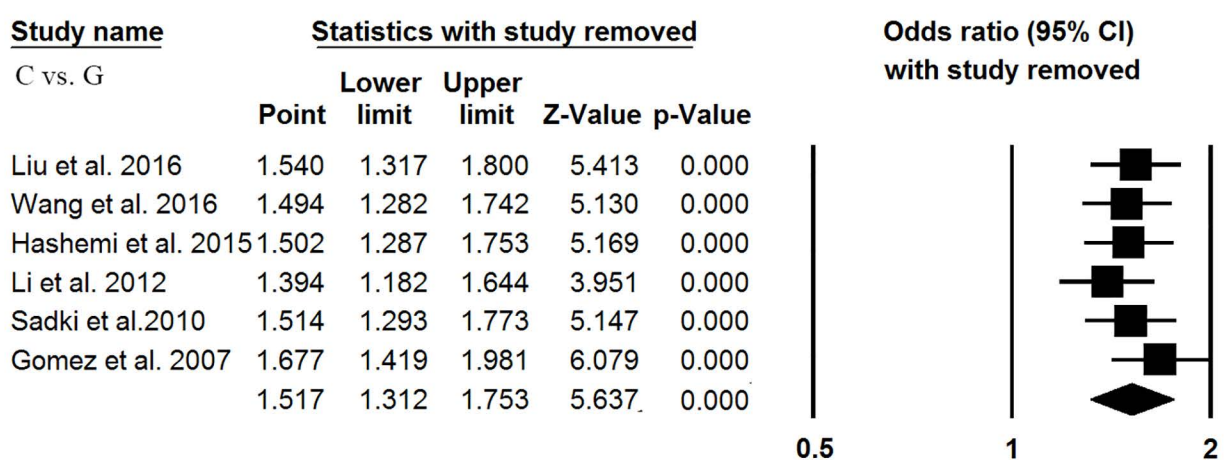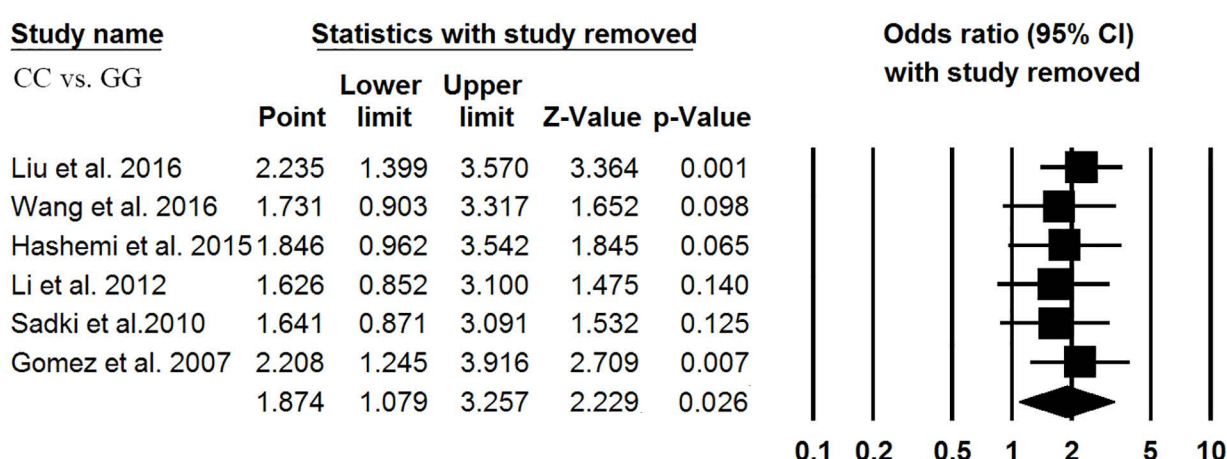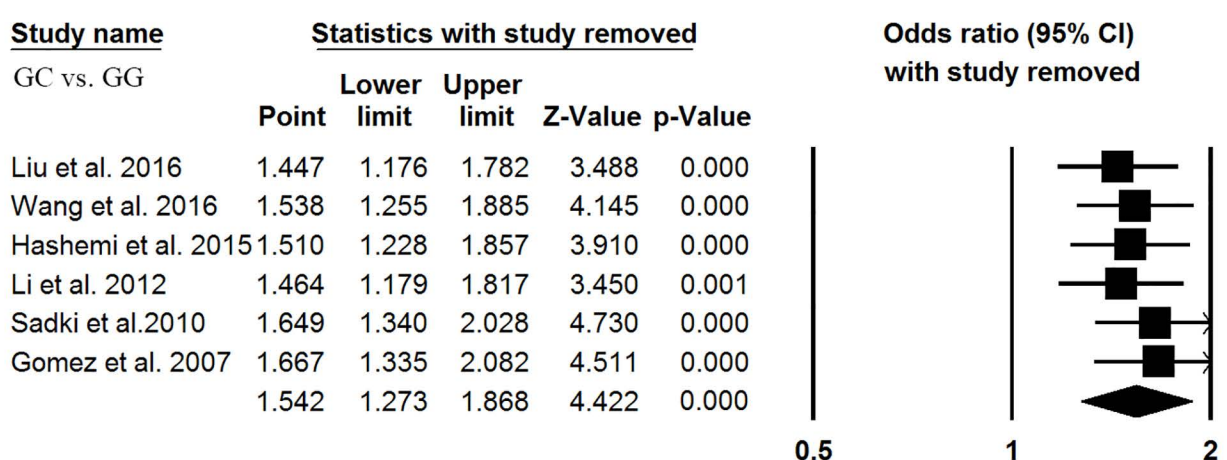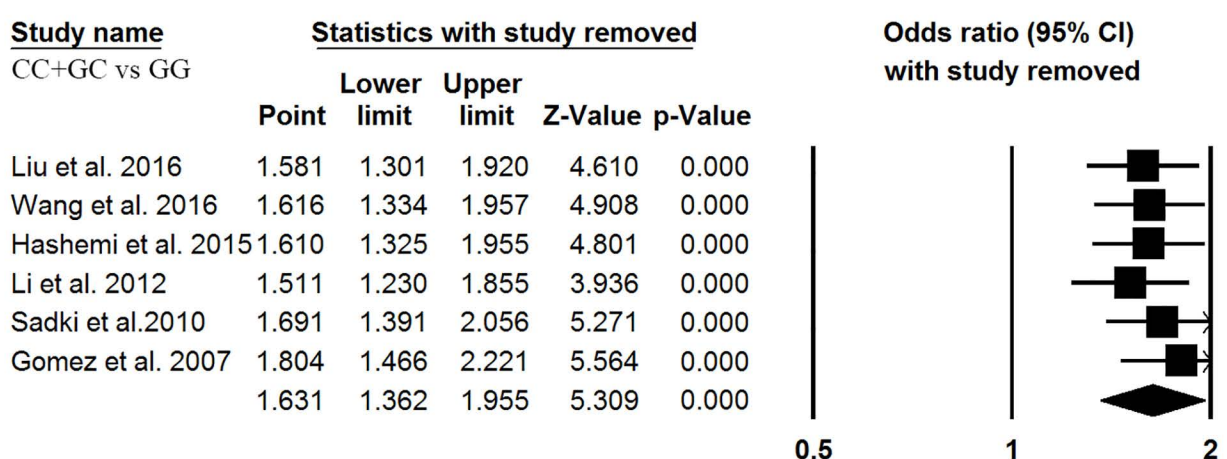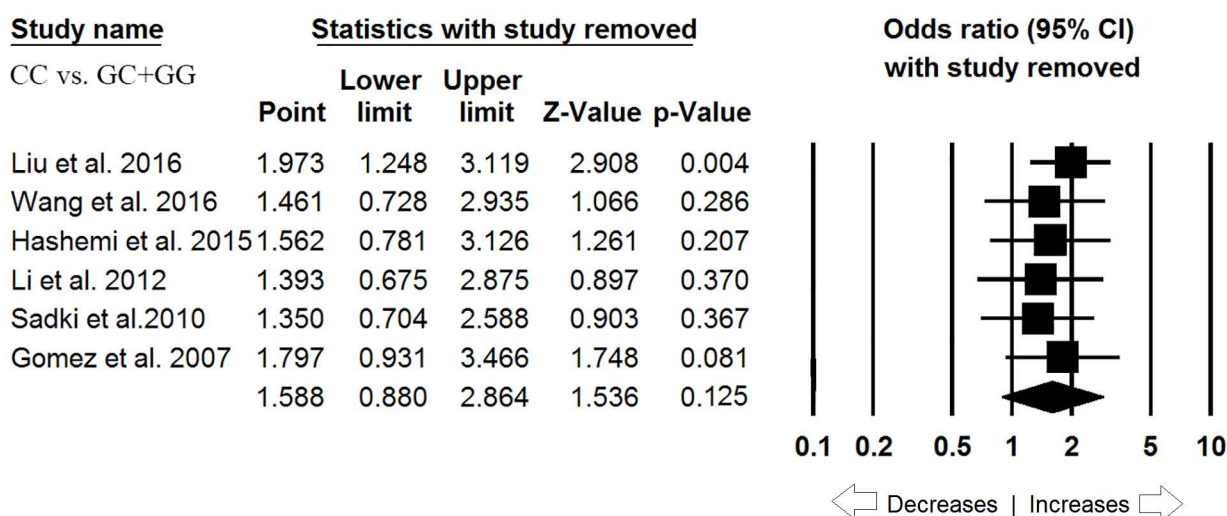

Figure SI3: Sensitivity analysis of MIF -173 G>C gene polymorphism with overall TB risk to evaluate the influence of each individual study on the pooled OR by deleting one single study each time for overall analysis (for all the genetic models) Black square represents the value of OR and the size of the square indicates the inverse proportion relative to its variance. Horizontal line is the 95% CI of OR.

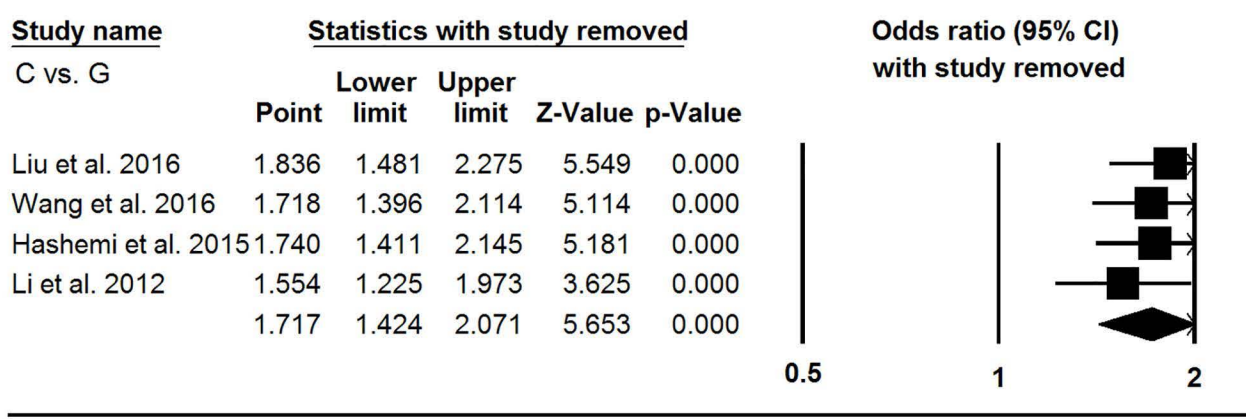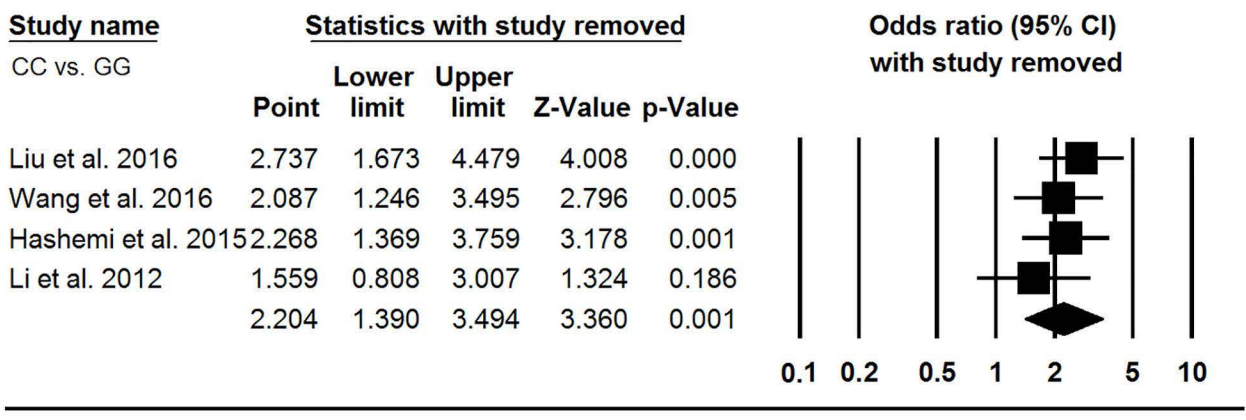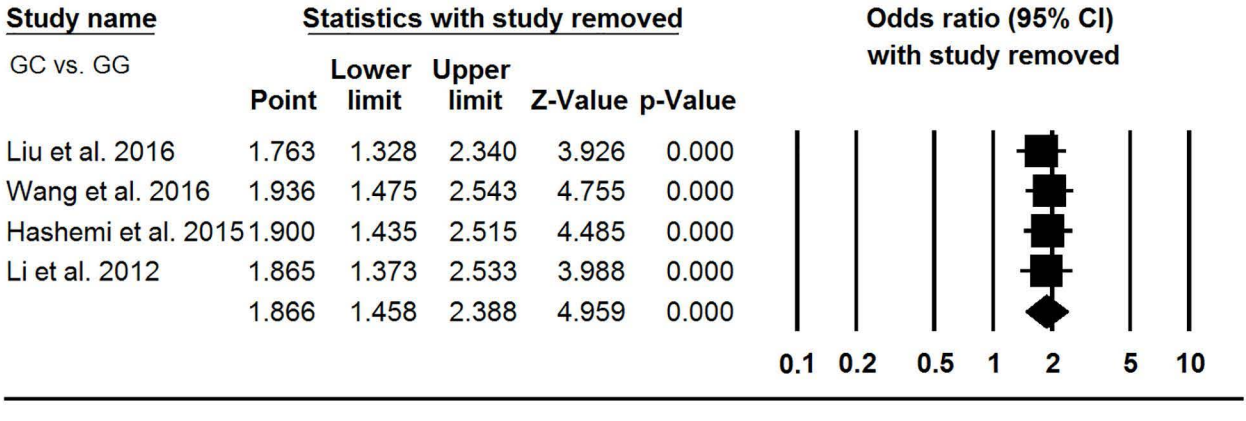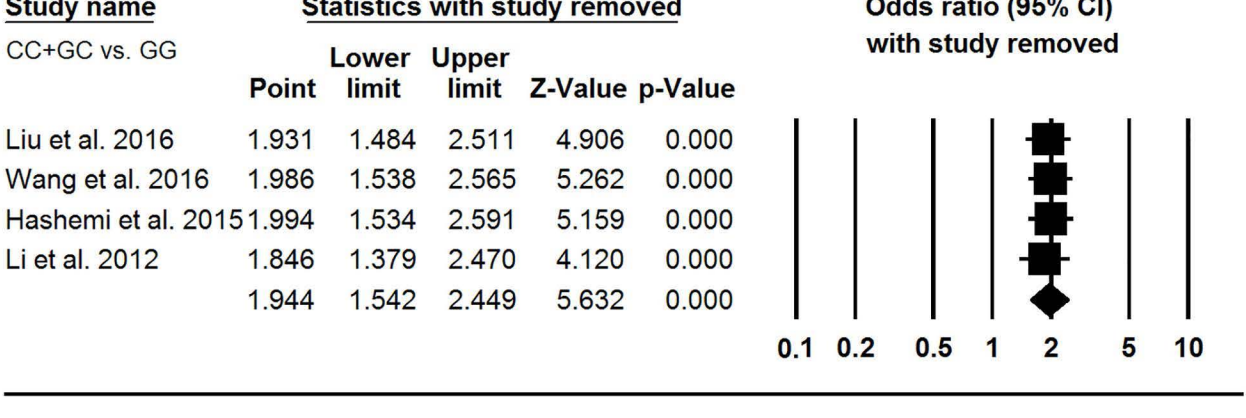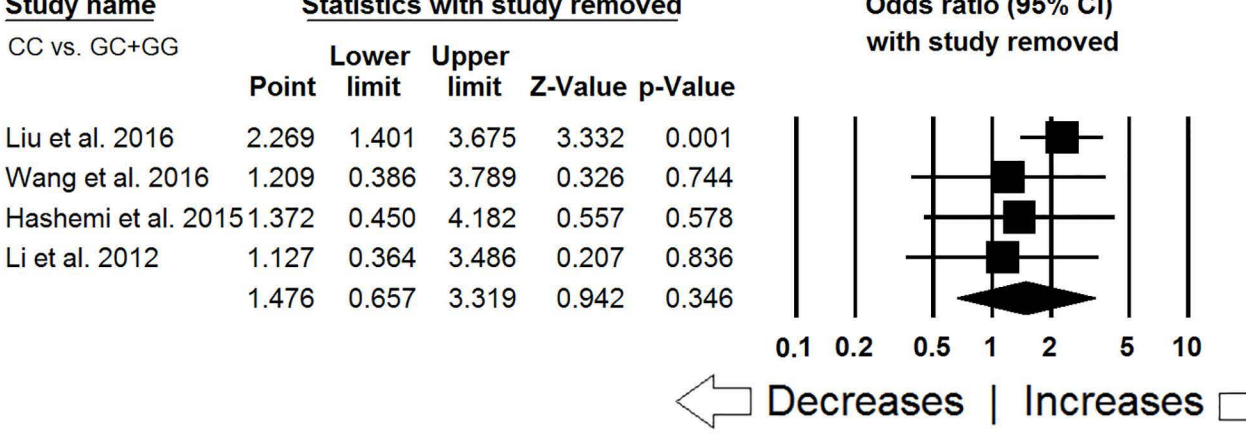

Figure SI4: Sensitivity analysis of MIF -173 G>C gene polymorphism with TB risk among Asian population to evaluate the influence of each individual study on the pooled OR by deleting one single study each time for subgroup analysis (for all the genetic models). Black square represents the value of OR and the size of the square indicates the inverse proportion relative to its variance. Horizontal line is the 95% CI of OR.
